# Supplementary material
Source: Springer Nature journal article supplement (https://www.springermedizin.de/resource/supplementary/12936_2011_1690_MOESM2_ESM.pdf/9541518)

**A**

1 TGCATTGATACCAACGTTCCAGACAACGC GGCTGCTACAGGTATCTGGATGGTACGGAG  
 1 C I D T N V P D N A A C Y R Y L D G T E

61 GAATGGCGCTGCTTGTTGACATTCAAGGAGGAAGGCGGCAAGTGCCTGCCTGCATCGAAC  
 21 E W R C L L T F K E E G G K C V P A S N

121 GTCACCTGTAAGGACAATAACGGGGGATGCGCTCCGGAGGCTGAGTGTAAGATGACCGA  
 41 V T C K D N N G G C A P E A E C K M T D

181 AGTAATAAGATCGTATGCAAGTGACTAAAGAGGGCTCCGAGCCACTCTTTGAGGGGGTC  
 61 S N K I V C K C T K E G S E P L F E G V

241 TTCTGCTCCAGCTCTTCTTTTCTCACTTAGCTTCTCTGTTGCCCATGCTCCTCTTTCCTA  
 81 F C S S S S F L S L S F L L P M L L F L

301 TTATGTATGGAGCTCCCTGGTCCAGGACCTGGTCCAGGACCTGGTCCAGGTACCTGCAG  
 101 L C M E L P G P G P G P G P G P G T L Q

361 ACGCGTATCGATGAATTCGGACCTGGTCCAGGACCTGGTCCAGGACCGGGGATAGAGCT  
 121 T R I D E F G P G P G P G P G P G D R A

421 GCAGGACAAGCTGCTGGTGATAGAGCTGCAGGTCAAGCAGCTGGTGATAGAGCTGCAGGA  
 141 A G Q A A G D R A A G Q A A G D R A A G

481 CAACCTGCAGGAGATAGAGCTGCAGGTCAACCAGCT  
 161 Q P A G D R A A G Q P A

**PvMSP1<sub>ICB10</sub>****Linker****PvCSP<sub>TR</sub>****B**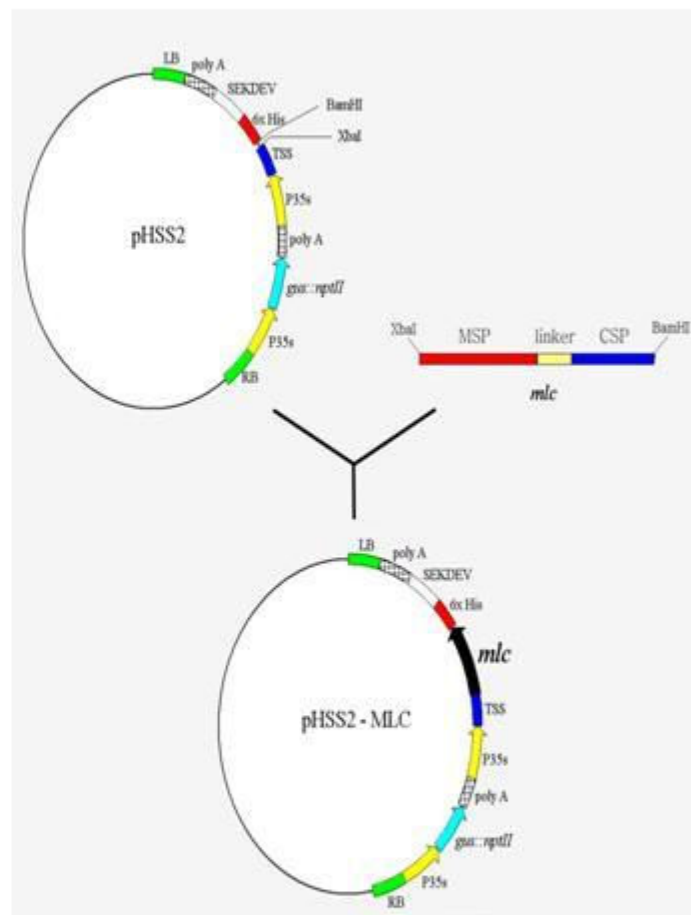

Supplement: MOESM2 [file 9541518]
